# Supplementary material
Source: PubMed Central journal article supplement (PMC7379382)
Supplement: oc0c00068_si_001.pdf [file oc0c00068_si_001.pdf]

## SUPPORTING INFORMATION

### Mimicking Natural Human Hair Pigmentation with Synthetic Melanin

*Claudia Battistella<sup>1</sup>, Naneki C. McCallum<sup>1</sup>, Karthikeyan Gnanasekaran<sup>1</sup>, Xuhao Zhou<sup>1</sup>, Valeria Caponetti<sup>2</sup>, Marco Montalti<sup>2</sup>, Nathan C. Gianneschi<sup>1\*</sup>*

<sup>1</sup>Department of Chemistry, Department of Materials Science & Engineering, Department of Biomedical Engineering, Department of Pharmacology, International Institute for Nanotechnology, Simpson-Querrey Institute, Chemistry of Life Processes Institute, Northwestern University, Evanston, Illinois 60208, United States.

<sup>2</sup>Department of Chemistry “Giacomo Ciamician”, University of Bologna, Via Selmi 2, 40126 Bologna, Italy.

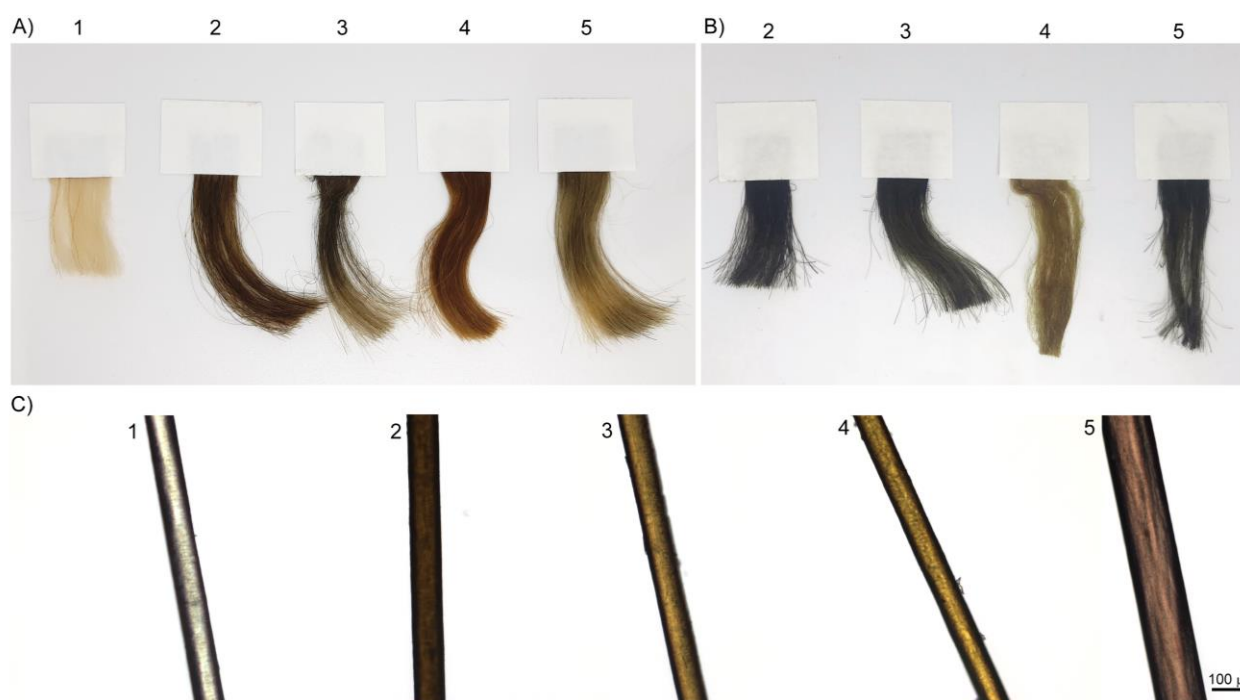

**Figure S1.** Blond, human hair purchased from a second vendor (Emosa) was dyed using polydopamine formulations (companion to **Figure 1**, main text). A) Photographs of hair before (1) and after dyeing at room temperature for 2 h using 3%  $\text{NH}_4\text{OH}$  (2), 0.05 N  $\text{NaOH}$  (3), 10 mM  $\text{CuSO}_4/1$  M  $\text{H}_2\text{O}_2$  (4) and Tris buffer pH 8.5 (5). B), as for A), but the dyeing was conducted at 37-40 °C. C) Optical micrographs of individual hair fibers dyed at 37-40 °C (panel B).

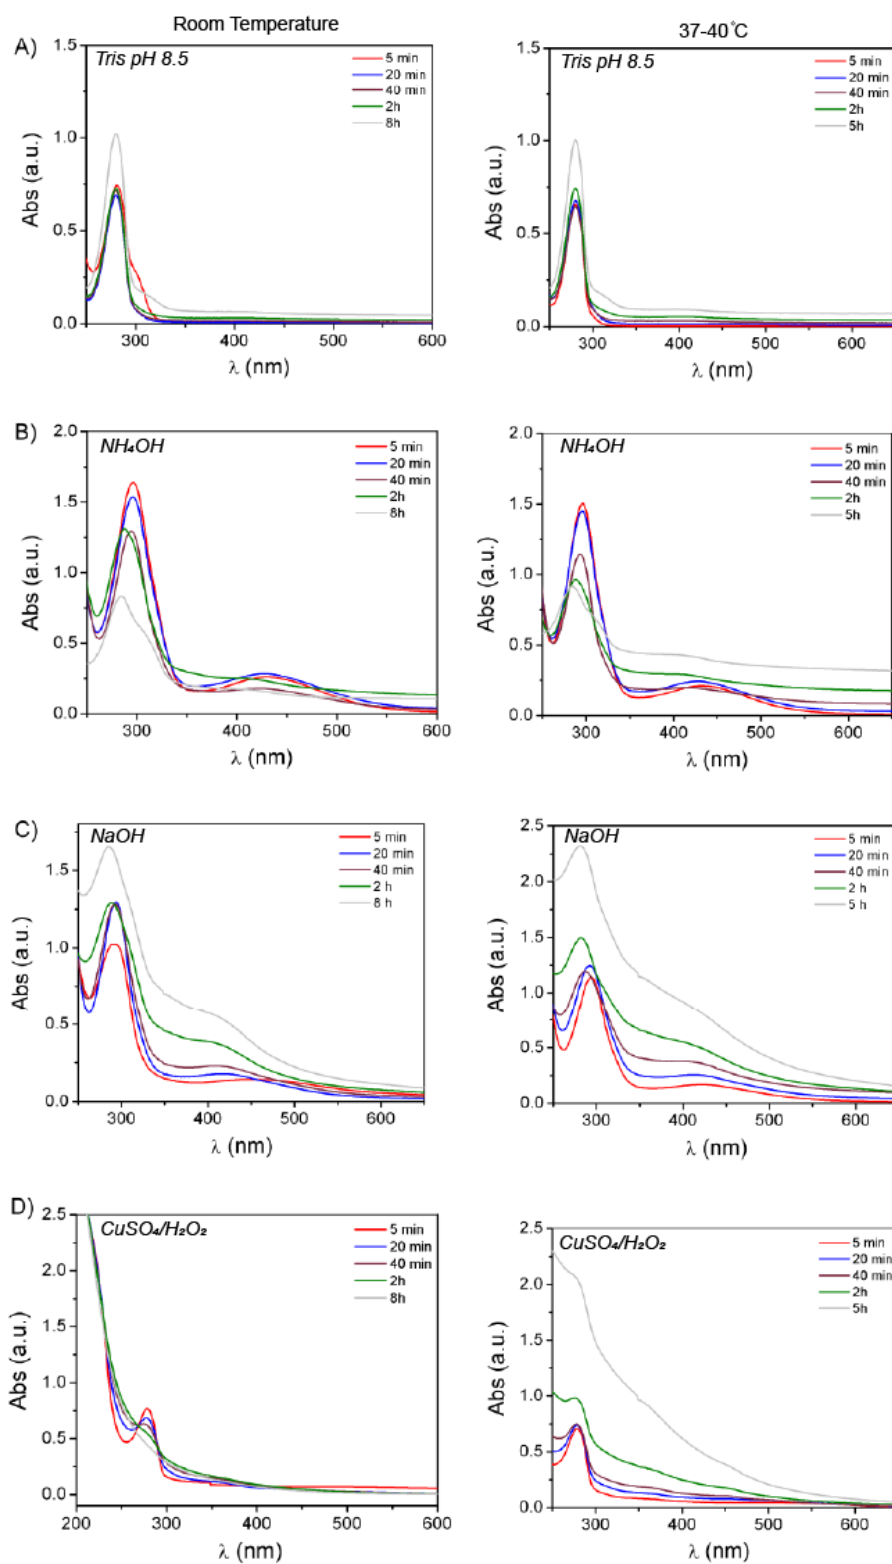

**Figure S2.** UV-Vis spectra of polydopamine solutions obtained at different reaction times using A) Tris buffer pH 8.5, B) 3%  $\text{NH}_4\text{OH}$ , C) 0.05 N  $\text{NaOH}$ , and D) 10 mM  $\text{CuSO}_4/1$  M  $\text{H}_2\text{O}_2$ . Reactions were carried out at room temperature (left panels) and at  $T = 37\text{-}40$  °C (right panels).

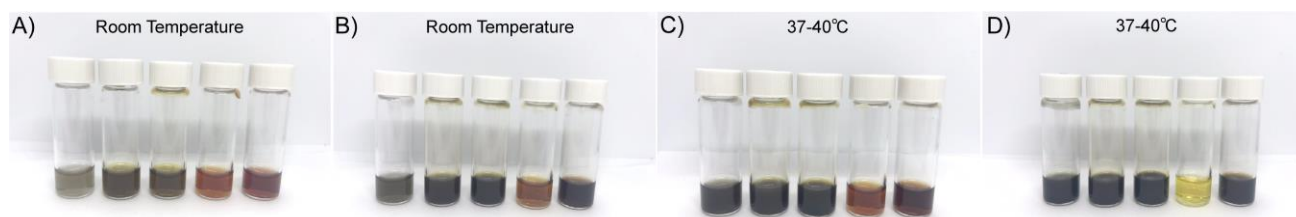

**Figure S3.** Color of polydopamine solutions obtained using different reaction conditions. Left to right in each panel: Tris buffer pH 8.5, 3% NH<sub>4</sub>OH, 0.05 N NaOH, 10 mM CuSO<sub>4</sub>/1 M H<sub>2</sub>O<sub>2</sub> and 10 mM CuSO<sub>4</sub>/15 mM H<sub>2</sub>O<sub>2</sub>). A, B) Reactions were carried out at room temperature. C, D) 37-40 °C. (A, C) Imaged after 20 mins. (B, D) Imaged after 2 hrs.

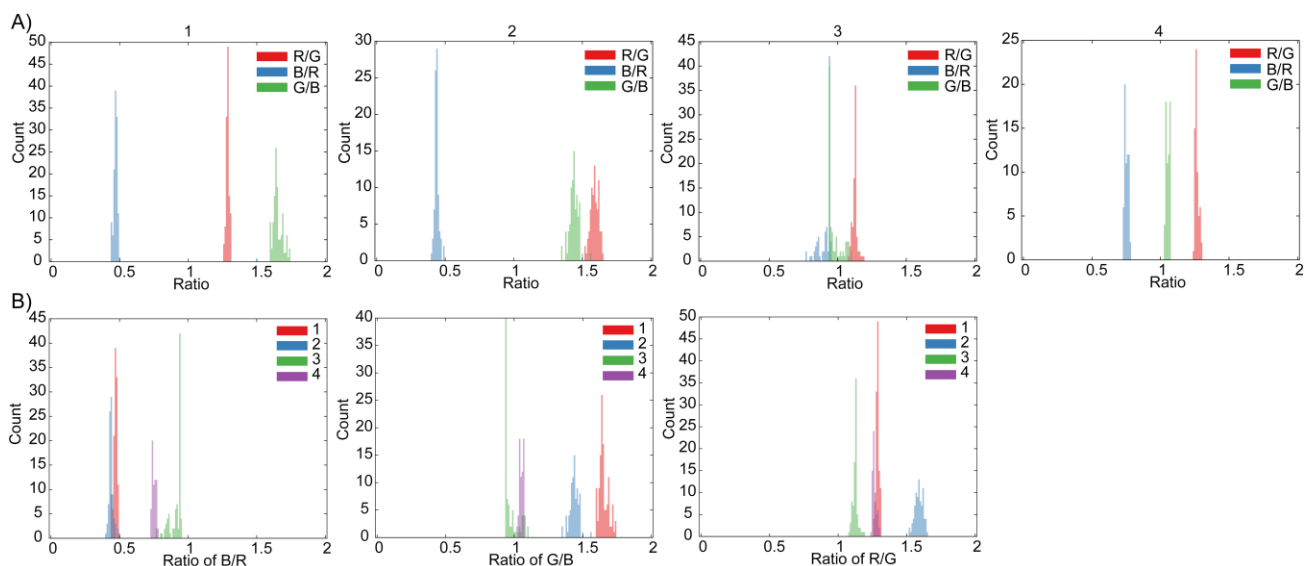

**Figure S4.** A) RGB color ratios. 1) Untreated blond hair. 2) Hair dyed with polydopamine using 3%  $\text{NH}_4\text{OH}$  at room temperature. Hair dyed with polydopamine using 3) 3%  $\text{NH}_4\text{OH}$  and 4) 6%  $\text{NH}_4\text{OH}$  at 37-40 °C. B) Comparison between RGB color ratios of hair samples 1-4. The photographs of samples 1-4 are shown in **Figure 3A** of the main text.

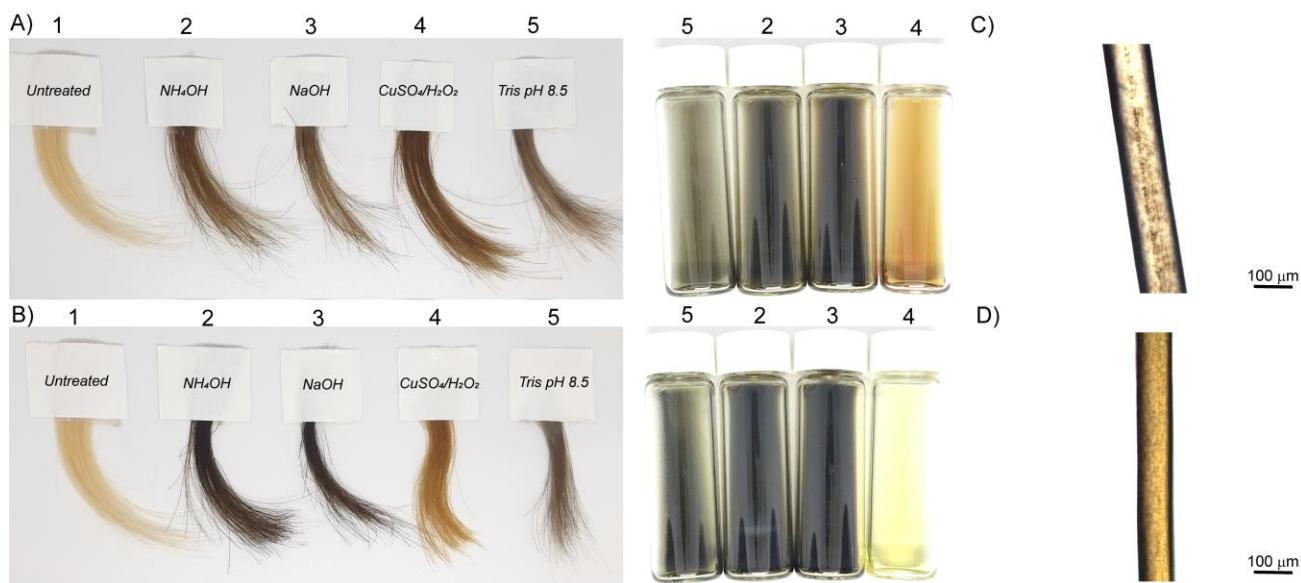

**Figure S5.** Photographs of hair before (1) and after dyeing with polydopamine using 3%  $\text{NH}_4\text{OH}$  (2), 0.05 N  $\text{NaOH}$  (3), 10 mM  $\text{CuSO}_4/1 \text{ M H}_2\text{O}_2$  (4) and Tris buffer pH 8.5 (5). Dyeing was carried out for 2 h at A) room temperature and B) 37-40 °C. The colors of the resulting polydopamine solutions in which the hair was suspended, are shown in vials. C) Optical microscopy images of an untreated blond hair fiber (sample 1 in panels A-B) and D) hair dyed using 10 mM  $\text{CuSO}_4/1 \text{ M H}_2\text{O}_2$  at 37-40 °C (Sample 4 in panel B).

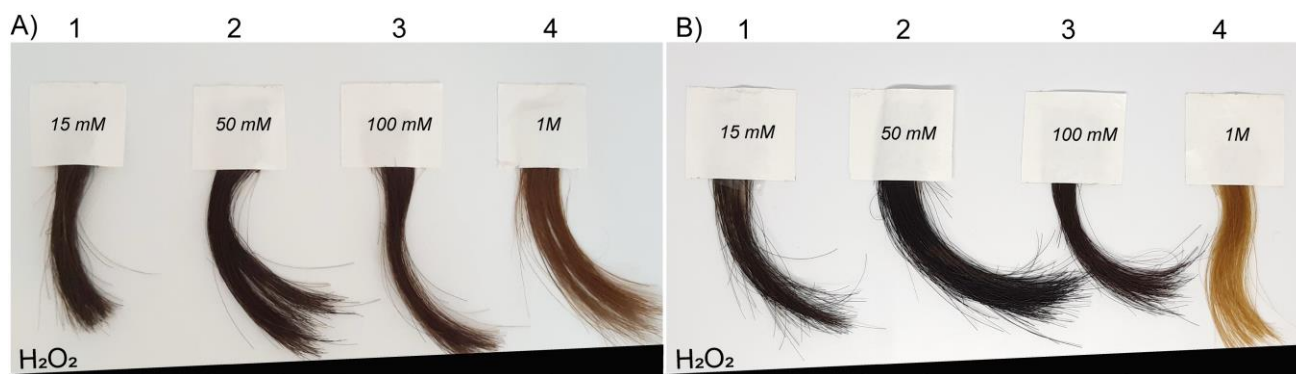

**Figure S6.** Photographs of hair dyed with polydopamine and CuSO<sub>4</sub>/H<sub>2</sub>O<sub>2</sub> using increasing H<sub>2</sub>O<sub>2</sub> concentrations: 15 mM (1), 50 mM (2), 100 mM (3) and 1 M H<sub>2</sub>O<sub>2</sub> (4). Reactions were carried out at A) room temperature and B) 37-40 °C.

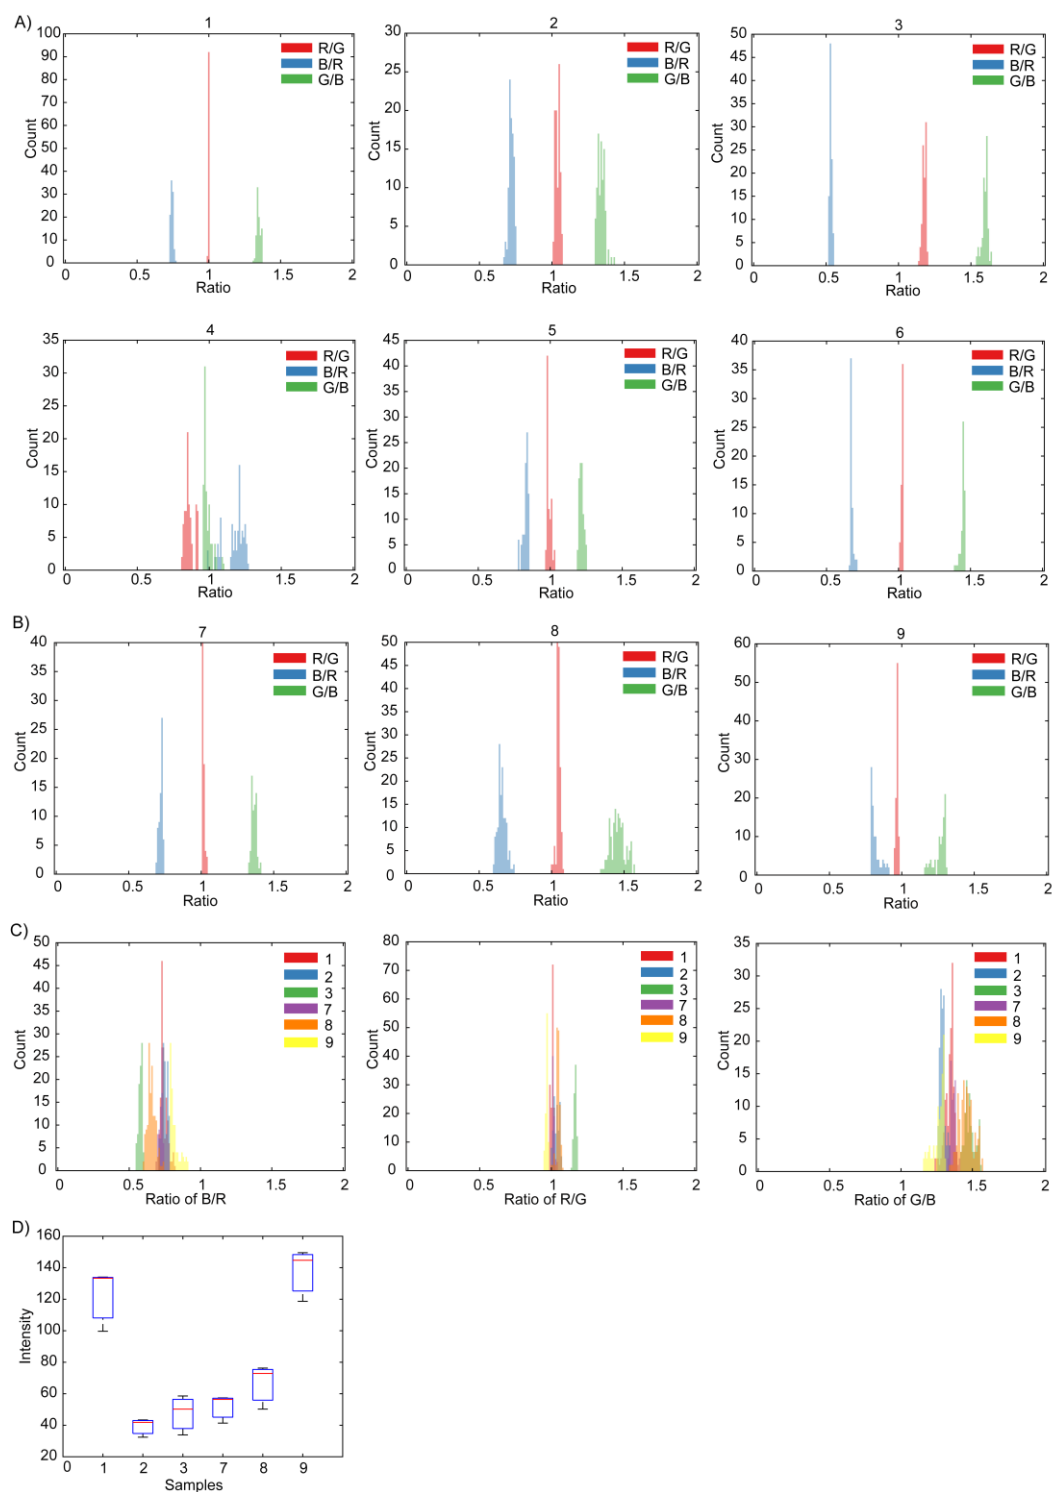

**Figure S7.** A) RGB color analysis of hair samples (1 to 6) highlights different RGB components for the untreated blond hair sample (1) and for hair dyed with polydopamine solutions. Reaction conditions: 10 mM  $\text{CuSO}_4$ /1 M  $\text{H}_2\text{O}_2$  at room temperature (2) and at 37-40 °C (3) as well as 3%  $\text{NH}_4\text{OH}$ /50 mM, 100 mM or 1 M  $\text{H}_2\text{O}_2$  at 37-40 °C (4,5,6). B) RGB color analysis of hair dyed using



3%  $\text{NH}_4\text{OH}$ /50 mM, 100 mM or 1 M  $\text{H}_2\text{O}_2$  at room temperature (7,8,9). C) RGB color ratios and D) color intensities of hair samples 7-9 are compared to those of untreated blond hair (1) and hair dyed using 10 mM  $\text{CuSO}_4$ /1M  $\text{H}_2\text{O}_2$ , either at room temperature (2) or at 37-40 °C (3). Photographs of hair samples 1-9 are shown in **Figure 4** of the main text.

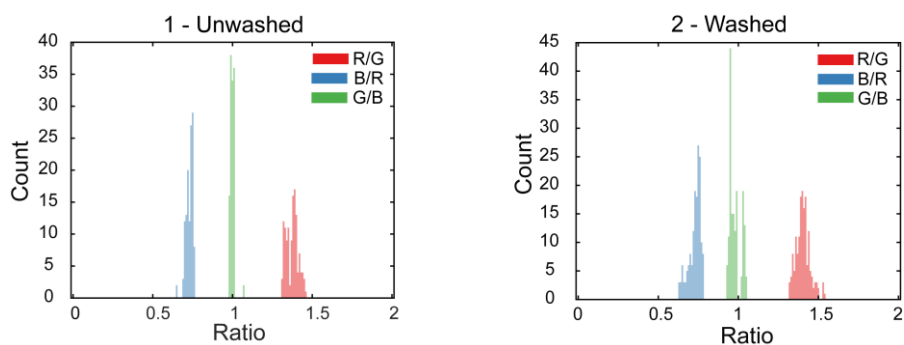

**Figure S8.** RGB color ratios of hair dyed with polydopamine using 6%  $\text{NH}_4\text{OH}$  for 2 at 37-40 °C before (1) and after (2) 18 washes with a 10% shampoo solution. A photograph is shown in the main text, **Figure 3A**.

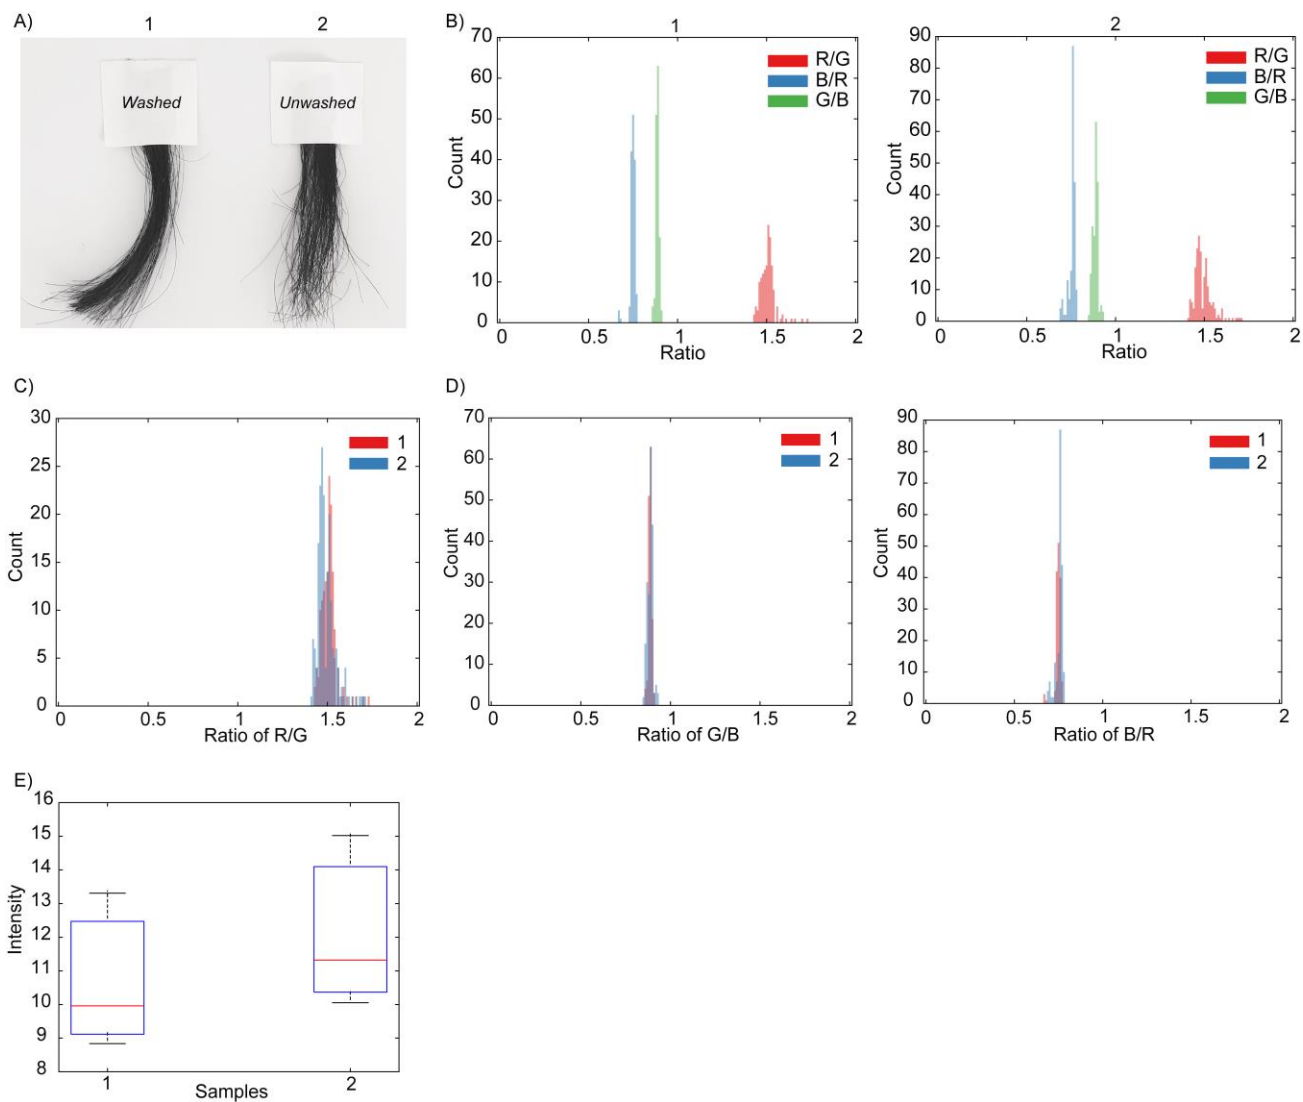

**Figure S9.** A) Photograph, B) RGB color analysis and C) comparison between RGB color ratios and D) color intensities of hair samples dyed with a commercially available hair dye before and after 18 washes with 10% shampoo.

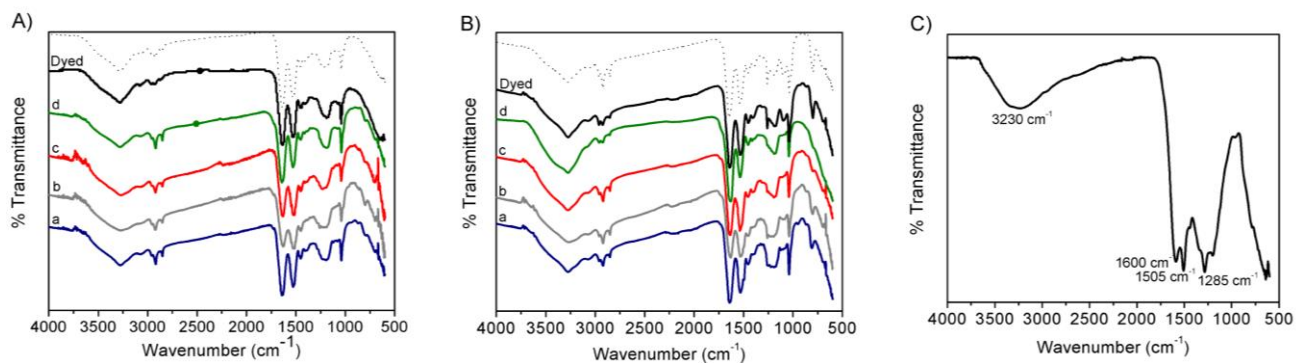

**Figure S10.** A) FTIR-ATR spectra of hair before (dashed line) and after (solid lines) dyeing with polydopamine formulations (a= Tris buffer pH 8.5, b= 3%  $\text{NH}_4\text{OH}$ , c= 0.05 N  $\text{NaOH}$ , d= 10 mM  $\text{CuSO}_4/1$  M  $\text{H}_2\text{O}_2$ ) or with a dark brown, commercial dye (Dyed). B) Hair dyed using the same protocols as A), but derived from a second vendor (Emosa) were also analyzed and showed very similar results. C) FTIR-ATR spectra of lyophilized polydopamine nanoparticles.

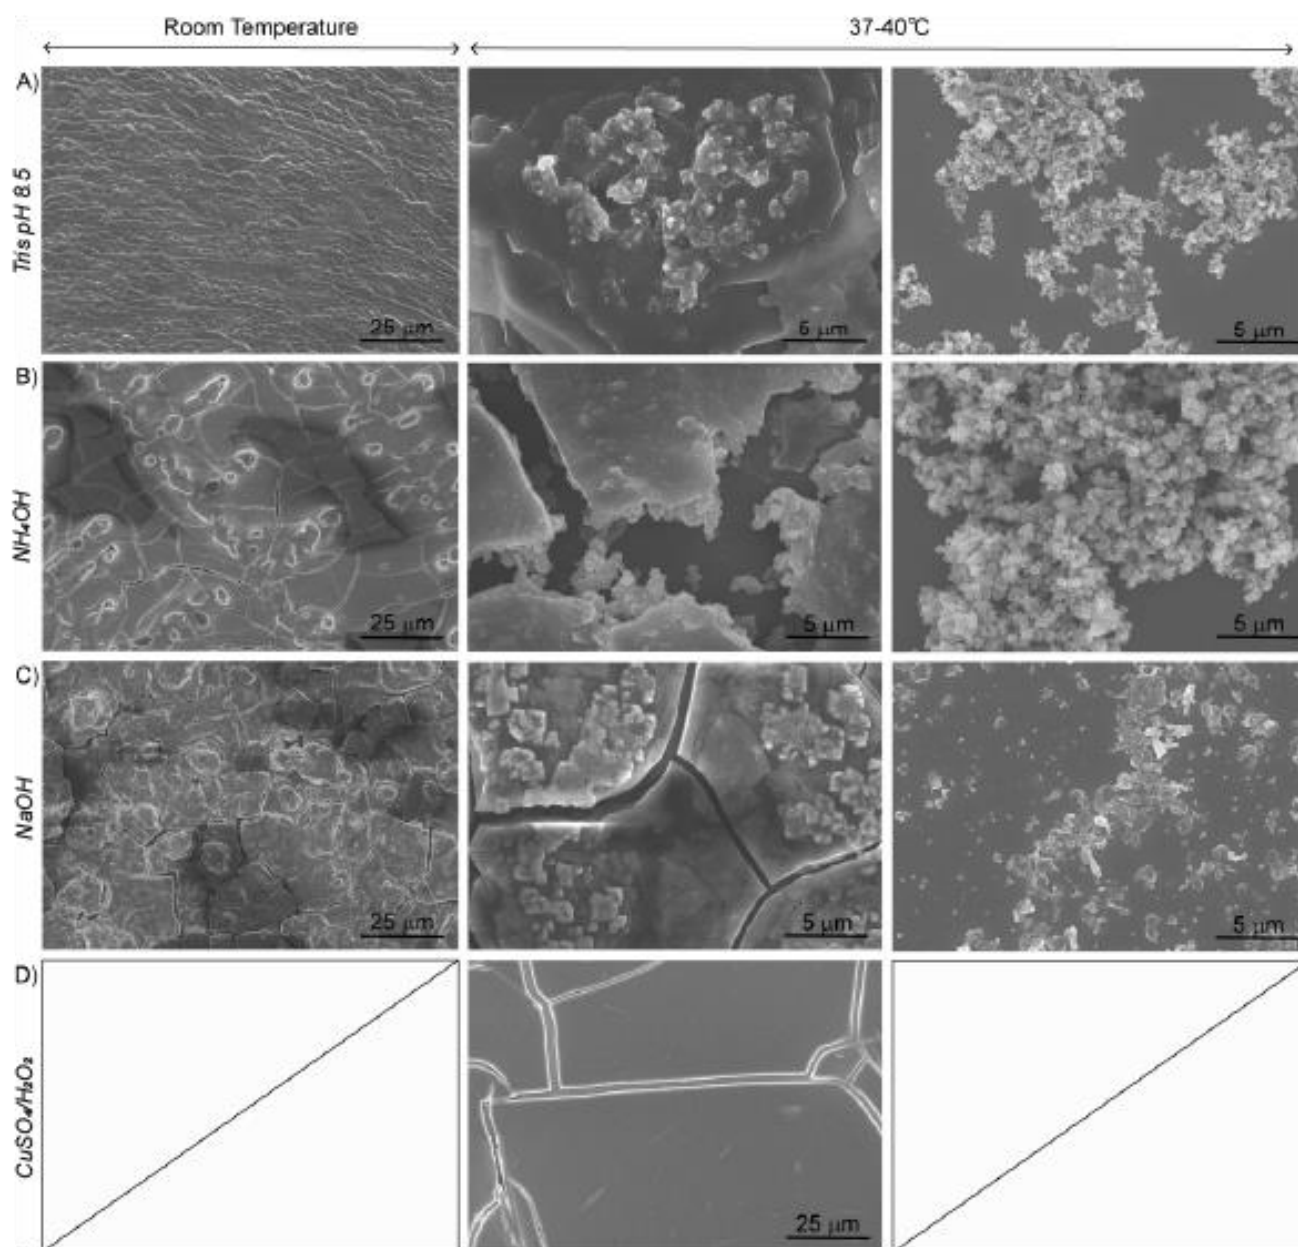

**Figure S11.** SEM images of polydopamine solutions obtained after a 2 h reaction at room temperature (left images) and at 37-40 °C (center and right images). Reaction conditions: A) Tris buffer pH 8.5, B) 3% NH<sub>4</sub>OH, C) 0.05 N NaOH, and D) 10 mM CuSO<sub>4</sub>/1 M H<sub>2</sub>O<sub>2</sub>. Purified polydopamine nanoparticles obtained after 2 h oxidation at 37-40 °C using alkaline conditions A-C are shown in the right panel. Reaction solutions obtained using D) CuSO<sub>4</sub>/ H<sub>2</sub>O<sub>2</sub> did not result in nanoparticle formation, one example of SEM image is reported in the center panel (D, 37-40 °C).

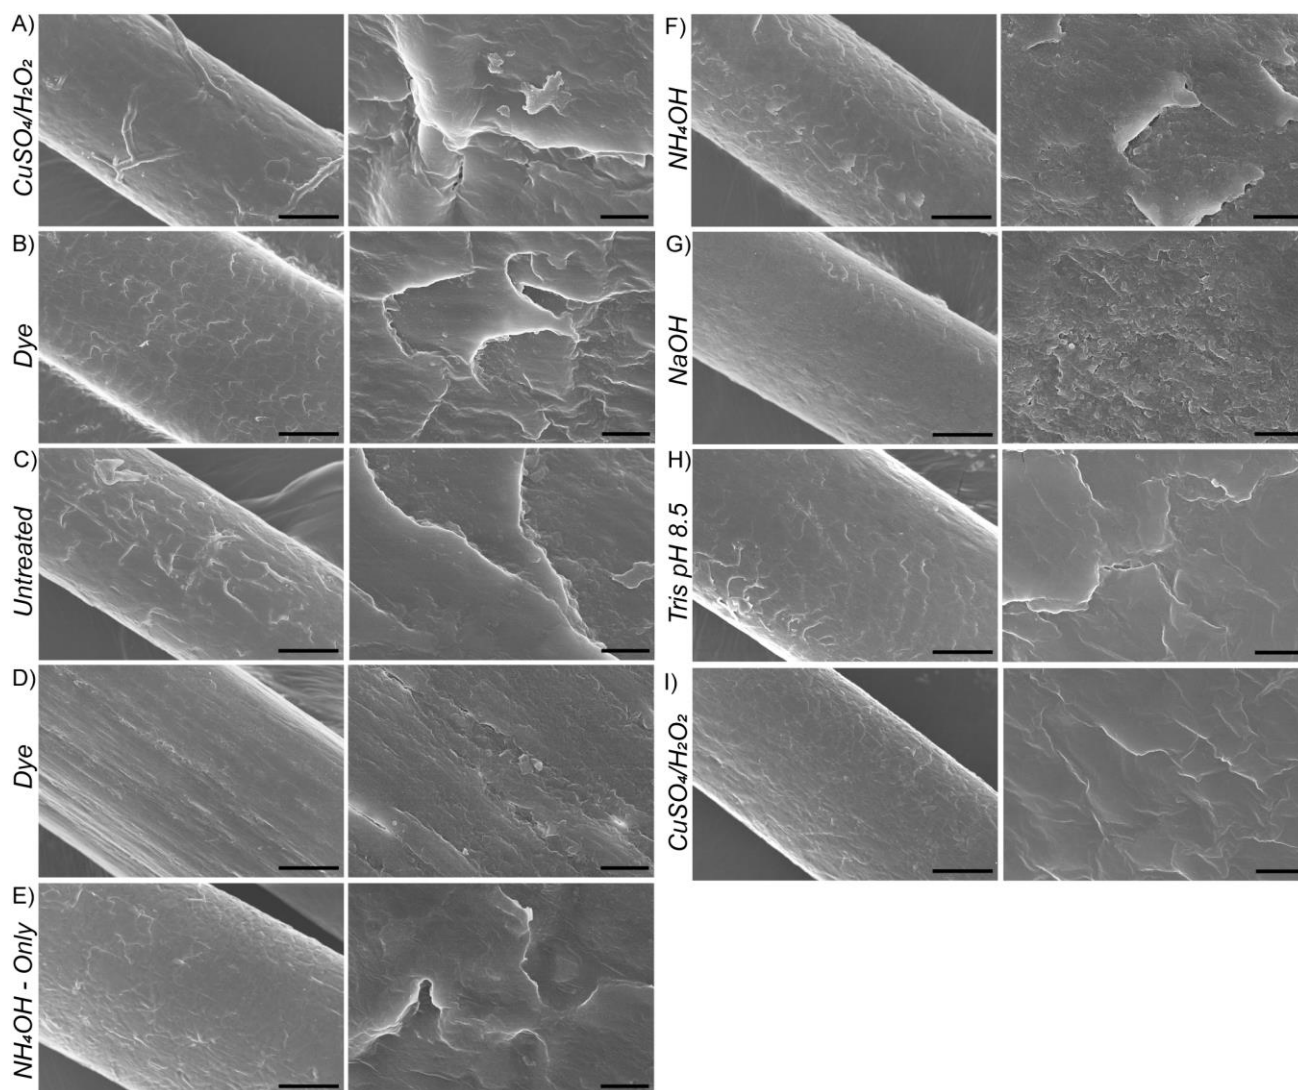

**Figure S12.** A) SEM images of hair purchased from Jerome Krause Fashion Hair and dyed using dopamine and 10 mM  $\text{CuSO}_4/1\text{M H}_2\text{O}_2$  and B) hair dyed with a commercial dark brown hair dye. C) SEM images of hair samples purchased from Emosa and D) dyed with a commercial dark brown hair dye or E) treated with 3%  $\text{NH}_4\text{OH}$ . Polydopamine deposition was carried out at 37-40 °C for 2 h using F) 3%  $\text{NH}_4\text{OH}$ , G) 0.05 N  $\text{NaOH}$ , H) Tris buffer pH 8.5 and I) 10 mM  $\text{CuSO}_4/1\text{ M H}_2\text{O}$ . Scale bars 25  $\mu\text{m}$  (left columns), and 2  $\mu\text{m}$  (right columns).

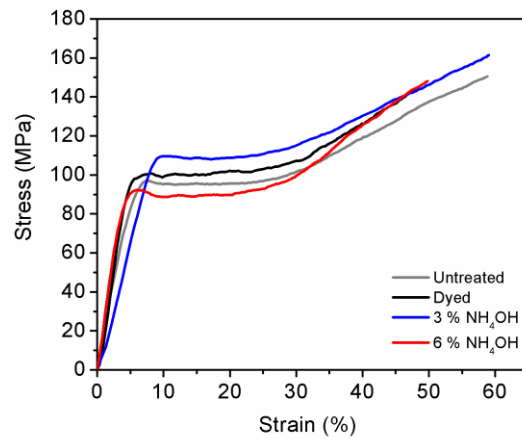

**Figure S13.** Shear and stress curves of hair before (untreated) and after polydopamine dyeing using 3% and 6%  $\text{NH}_4\text{OH}$ , as well as after dyeing with a commercial dark brown hair dye (Dyed). Results are reported as the average of five independent experiments.

**Table S1.** Mechanical properties of hair before and after dyeing using either 3% or 6%  $\text{NH}_4\text{OH}$  or using a commercially available hair dye. The average results are indicated in bold.

| Conditions                  | Strain at Break<br>(mm/mm) | Young's Modulus<br>(GPa) |
|-----------------------------|----------------------------|--------------------------|
| Untreated                   | 0.795                      | 3.073                    |
|                             | 0.606                      | 3.482                    |
|                             | 0.746                      | 1.716                    |
|                             | 0.681                      | 2.032                    |
|                             | 0.524                      | 3.448                    |
|                             | <b>0.6704</b>              | <b>2.7502</b>            |
| 3% $\text{NH}_4\text{OH}^*$ | 0.644                      | 1.92                     |
|                             | 0.576                      | 2.875                    |
|                             | 0.815                      | 1.743                    |
|                             | 0.77                       | 2.737                    |
|                             | 0.83                       | 1.841                    |
|                             | <b>0.727</b>               | <b>2.2232</b>            |
| 6% $\text{NH}_4\text{OH}^*$ | 0.566                      | 3.415                    |
|                             | 0.617                      | 3.156                    |
|                             | 0.566                      | 2.181                    |
|                             | 0.614                      | 2.869                    |
|                             | 0.671                      | 2.304                    |
|                             | <b>0.5988</b>              | <b>2.785</b>             |
| Dyed**                      | 0.592                      | 2.657                    |
|                             | 0.461                      | 4.566                    |
|                             | 0.8                        | 1.931                    |
|                             | 0.653                      | 2.107                    |
|                             |                            | <b>0.6265</b>            |

\* Hair dyed with polydopamine at 37-40°C for 2 h.

\*\*Hair dyed using a commercial hair dye.
